# Supplementary material
Source: PubMed Central journal article supplement (PMC6298217)
Supplement: NIHMS991959-supplement-Supplemental_Figures.pdf [file NIHMS991959-supplement-Supplemental_Figures.pdf]

A.

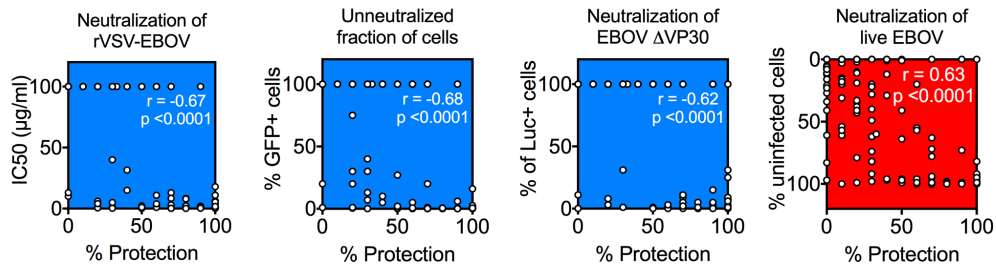

B.

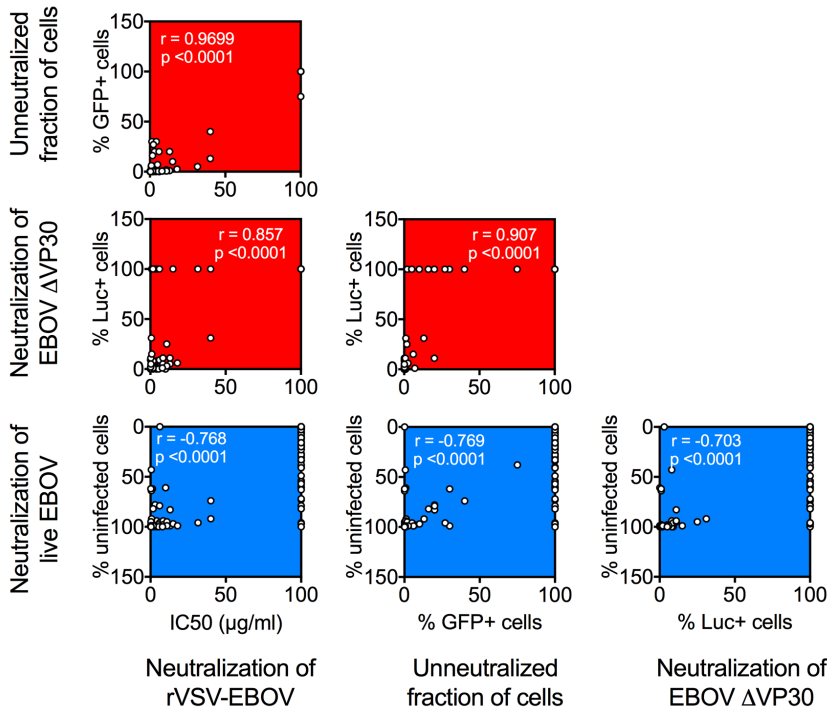

**Figure S1. Neutralization activity is associated with mAb-mediated protection, related to Figure 3.**

- Spearman rho correlation analyses was used to determine significant associations between neutralizing activity in the four neutralization readouts and protection. Red background of graph indicates a significant positive association, a blue background indicates a significant negative association, and a white background indicates no significant association.
- Spearman rho correlation analyses was used to determine if neutralization assays are correlated with each other. Red background of graph indicates a significant positive association, a blue background indicates a significant negative association, and a white background indicates no significant association.

A.

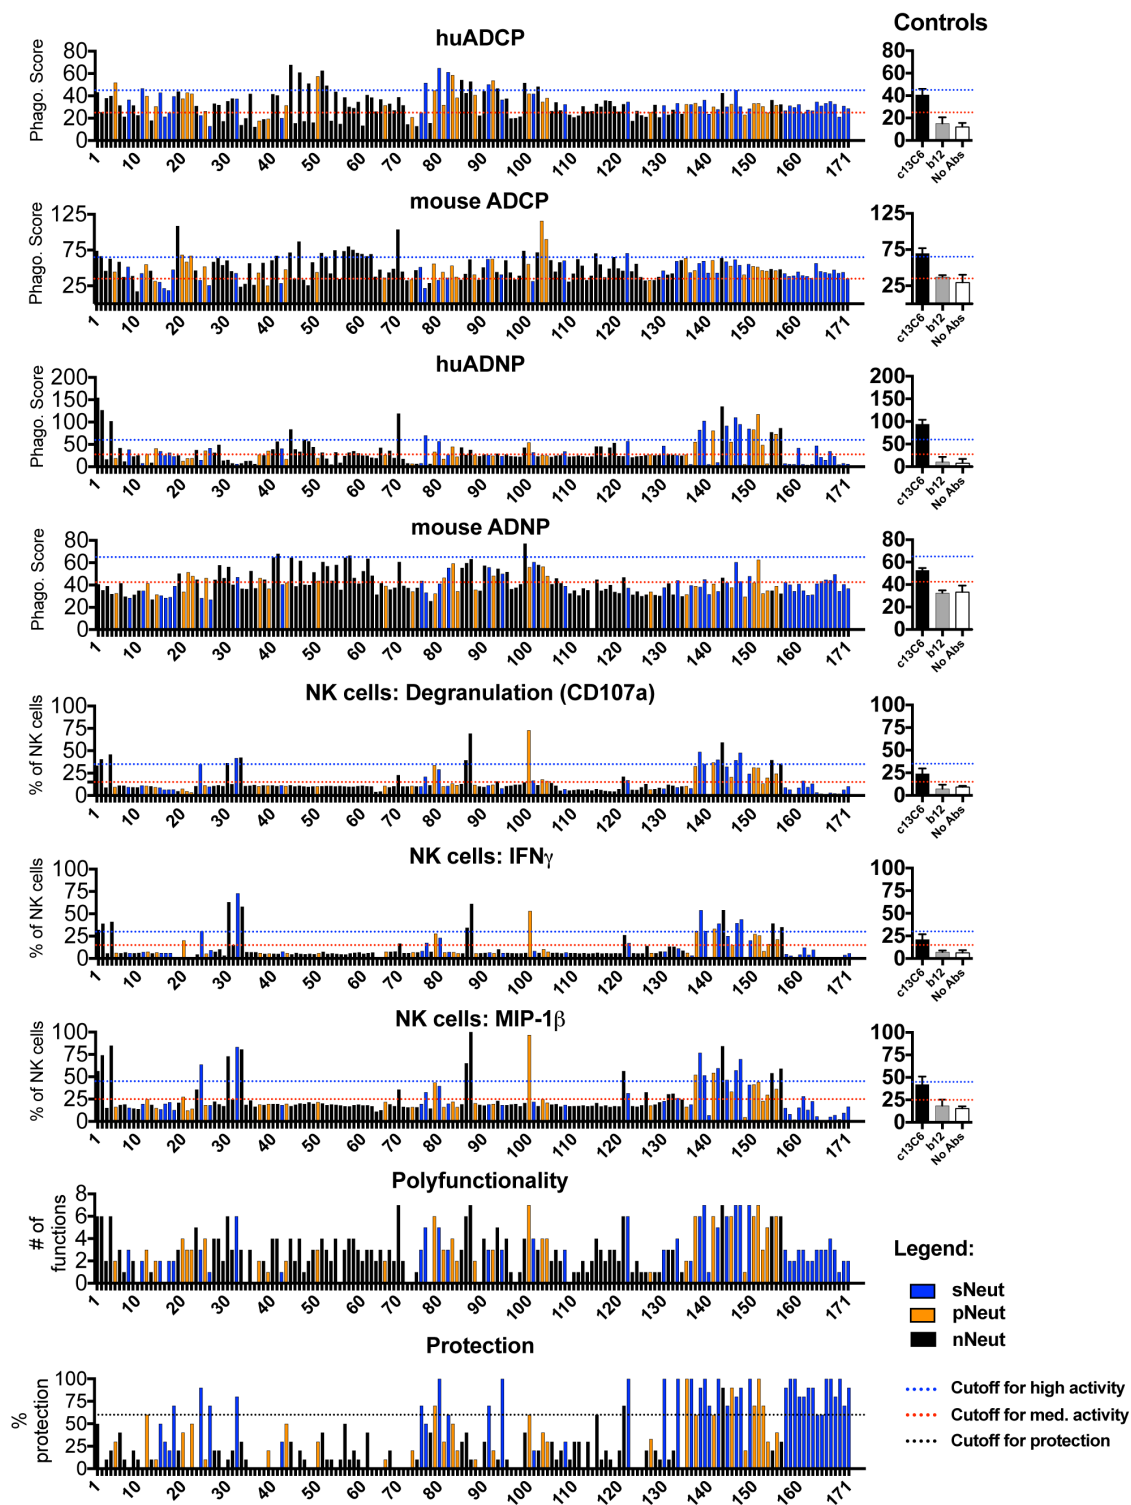

B.

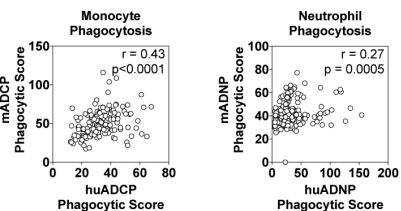

**Figure S2. Raw data of VIC functional assays and protection, related to Figure 2.**  
 Legend continued on next page.

**Figure S2. Raw data of VIC functional assays and protection, related to Figure 2 (con't).**

- A. The averaged raw values of technical duplicates for all VIC mAbs in each Fc-effector function assay, the number of functions (polyfunctionality), and protection are graphed. The color of each bar indicates the neutralization group (blue = sNeut; orange = pNeut; black = nNeut). The positive controls for each assay are graphed on the right (positive control = c13C6; negative control = b12 and no Abs). The cutoffs to define levels of functional activity are shown as dashed lines across the graphs (high activity = scores above blue dashed line; medium activity = scores between blue and red dashed lines; no activity = scores below dashed red line). The cutoff for protection is indicated with a black dashed line and is set at 60%.
- B. Spearman rho correlation analyses was used to determine associations between the phagocytic scores of VIC mAbs in either mouse or human monocytes (left) or human and mouse neutrophils (right).

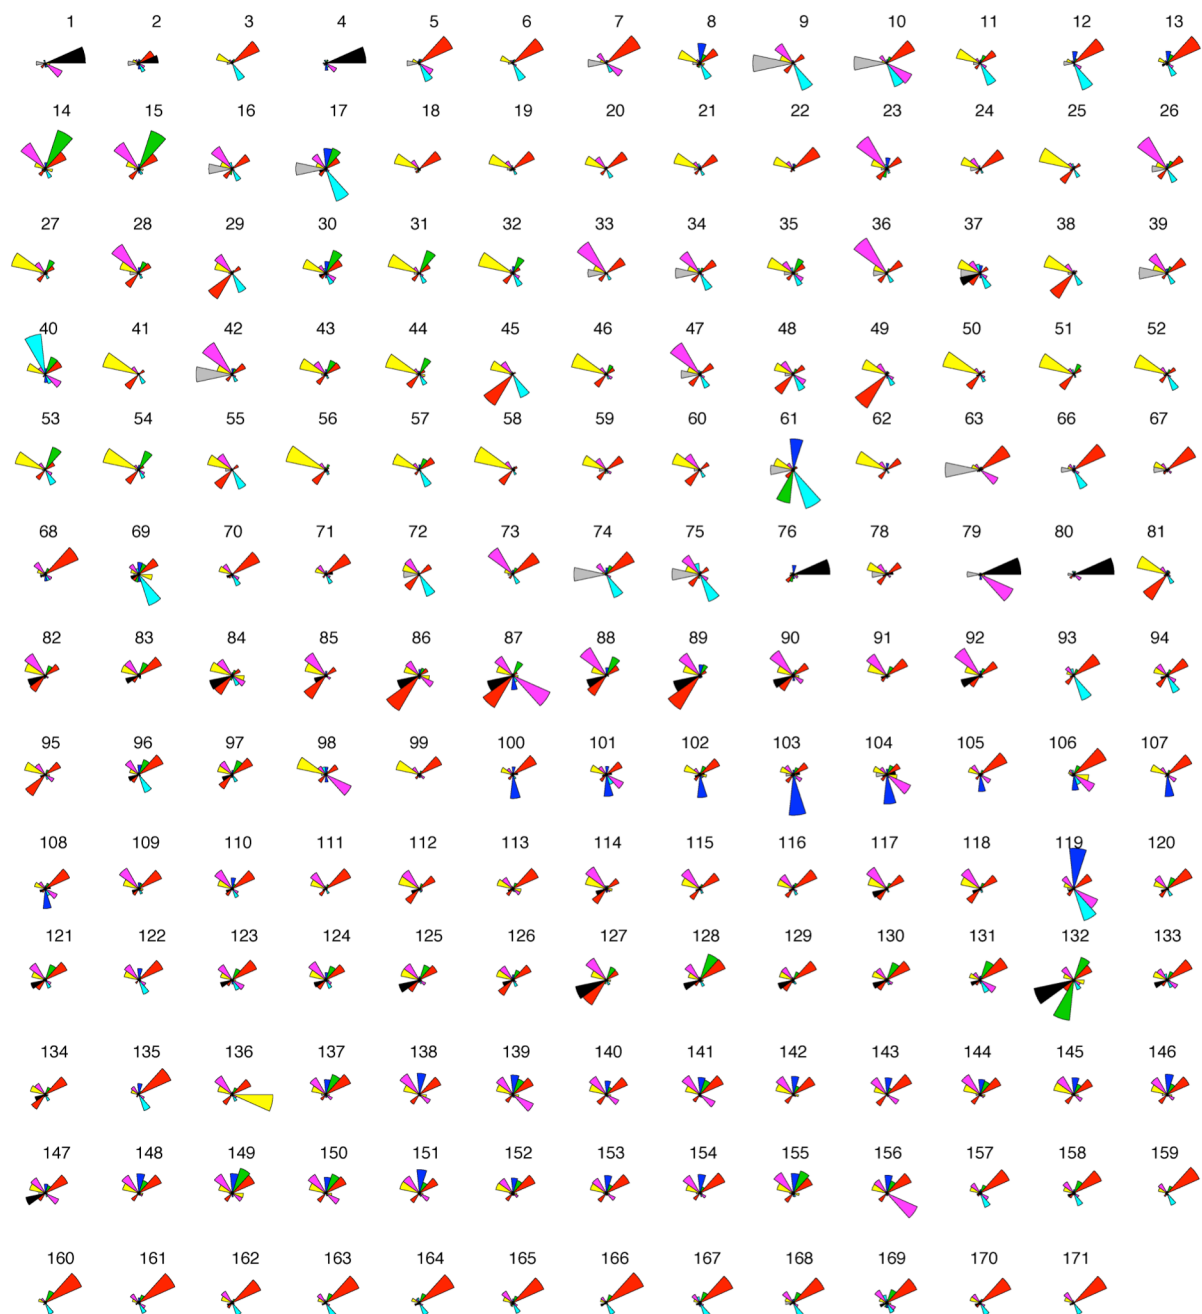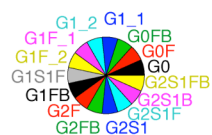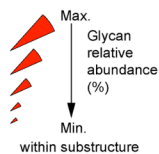

|             |  | Glycan Structure |      |       |       |        |       |       |
|-------------|--|------------------|------|-------|-------|--------|-------|-------|
|             |  | G1_1             | G0FB | G0F   | G0    | G2S1FB | G2S1B | G2S1F |
| Minimum (%) |  | 0.01             | 0.01 | 1.62  | 0     | 0      | 0.01  | 0     |
| Maximum (%) |  | 4.53             | 4.41 | 73.82 | 84.27 | 7.7    | 2.76  | 24.93 |

  

|             |  | Glycan Structure |      |      |       |       |       |
|-------------|--|------------------|------|------|-------|-------|-------|
|             |  | G2FB             | G2F  | G1FB | G1S1F | G1F_2 | G1F_1 |
| Minimum (%) |  | 0.01             | 0.4  | 0    | 0.01  | 0.01  | 0.02  |
| Maximum (%) |  | 8.86             | 33.3 | 4.55 | 12.39 | 66.43 | 23.55 |

**Figure S3. Fc glycan composition of each VIC mAb, related to Figure 3.**

The relative abundance (%) of the indicated glycan structures on each VIC mAb was determined, and plotted by mAb in a star plot. Each wedge is color coded by the indicated glycan structure, and the size of the wedge corresponds to the abundance of that structure compared to the rest of the mAbs within the VIC. The table indicates the minimum and maximum relative abundance (%) of each glycan.

**A**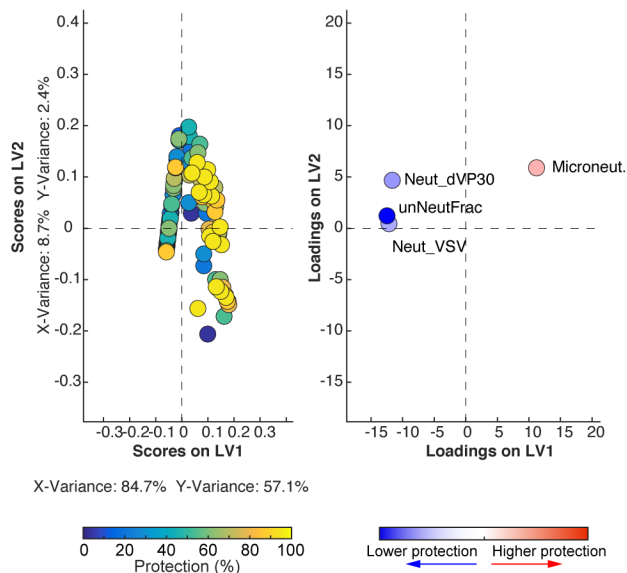**B**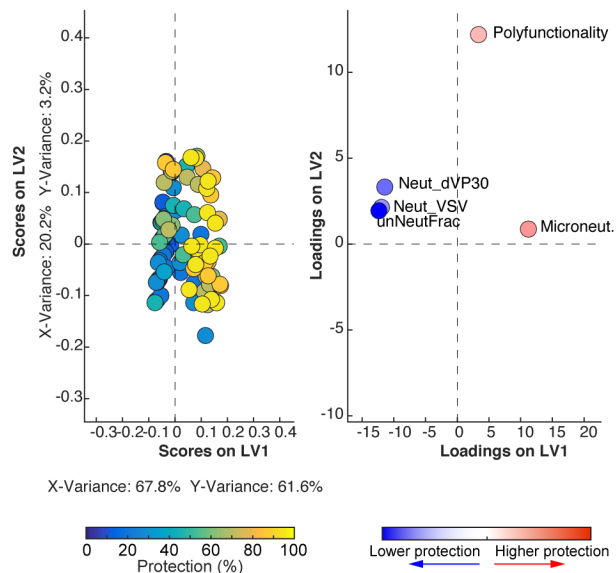

**Figure S4. Neutralization and polyfunctionality can separate protective and non-protective mAbs, related to Figure 3.**

Elastic Net/PLSR analysis of **(A)** neutralizing antibody features alone, or **(B)** neutralization and polyfunctionality features together. Each dot on the left graphs represents a different antibody, and are color coded to represent protective mAbs (green-yellow dots on left graph) from non-protective mAbs (light-dark blue dots). The mirror loadings plot (right graphs) show the features that drive the geographic location of the dots on the left graph. Features are color coded by importance to positively predicting protection (red) or negatively predicting protection (blue) as determined by variable influence on projection.

|                         | PC1   | PC2    | PC3    | PC4    | PC5    |
|-------------------------|-------|--------|--------|--------|--------|
| NK cells: CD107a        | 0.981 | -0.115 | -0.153 | 0.033  | -0.022 |
| NK cells: IFN $\gamma$  | 0.966 | -0.196 | -0.130 | 0.102  | 0.015  |
| NK cells: MIP-1 $\beta$ | 0.960 | -0.019 | -0.246 | -0.130 | 0.006  |
| ADNP                    | 0.762 | -0.168 | 0.625  | -0.024 | 0.000  |
| ADCP                    | 0.531 | 0.844  | 0.068  | 0.021  | 0.001  |

**Table S1. Loading matrix for PCA of functionality of neutralizing and non-neutralizing Ebola-specific mAbs, related to Figure 1.**

Loading matrix of functional features associated with principal components 1-5 (PC1-5) for Ebola-specific neutralizing and non-neutralizing mAbs.

## Antibody features measured

|                                                            |                                |
|------------------------------------------------------------|--------------------------------|
| Epitope                                                    | Glycan: total G0               |
| Binding affinity to GP (GP_EC50)                           | Glycan: total G1               |
| Binding affinity to sGP (sGP_EC50)                         | Glycan: total G2               |
| Cross reactivity                                           | Glycan: total fucose           |
| Subclass (hulgG1, hulgG3, mlgG1, mlgG2a, mlgG2b)           | Glycan: total bisecting GlcNAc |
| Species (human, mouse)                                     | Glycan: total sialic acid      |
| Neutralization: rVSV-EBOV                                  | Glycan: G0                     |
| Neutralization: Unneut. Fraction                           | Glycan: G0F                    |
| Neutralization: EBOVΔVP30                                  | Glycan: G0FB                   |
| Neutralization: microneutralization (Microneut.)           | Glycan: G1 (G1_1)              |
| Effector function: human ADCP (huADCP)                     | Glycan: G1' (G1_2)             |
| Effector function: mouse ADCP (mADCP)                      | Glycan: G1F (G1F_1)            |
| Effector function: human ADNP (huADNP)                     | Glycan: G1F' (G1F_2)           |
| Effector function: mouse ADNP (mADNP)                      | Glycan: G1FB                   |
| Effector function: NK cells CD107a                         | Glycan: G1S1F                  |
| Effector function: NK cells IFN $\gamma$ (IFN $\gamma$ )   | Glycan: G1FB                   |
| Effector function: NK cells MIP-1 $\beta$ (MIP-1 $\beta$ ) | Glycan: G2F                    |
| Effector function: polyfunctionality                       | Glycan: G2FB                   |
|                                                            | Glycan: G2S1                   |
|                                                            | Glycan: G2S1B                  |
|                                                            | Glycan: G2S1FB                 |

**Table S2. The antibody features measured through the VIC, related to Figure 3.**

Abbreviations used in PLSR models are in parentheses.

| Neutralization assay                    | Metric             | Activity in neutralization assay |         |      |
|-----------------------------------------|--------------------|----------------------------------|---------|------|
|                                         |                    | High                             | Med/Low | None |
| Neutralization of rVSV-EBOV GFP         | IC50 µg/ml         | ≤5                               | >5-50   | >50  |
| Unneutralized fraction of rVSV-EBOV GFP | % GFP+ cells       | <2%                              | ≥2%-75% | >75% |
| Neutralization of EBOV ΔVP30-Luc        | % Luc+ cells       | ≤5%                              | 5%-50%  | >50% |
| Microneutralization of EBOV             | % uninfected cells | ≥80%                             | 35%-79% | <35% |

**Table S3. Neutralization parameters used to define neutralization categories, related to Figure 4.**

The neutralizing activity of the VIC mAbs was evaluated in three neutralization assays, with four readouts of neutralization. Each mAbs was categorized into high, medium/low, and no activity according to assay standards.

| sNeuts |     | pNeuts | nNeuts |     |     |
|--------|-----|--------|--------|-----|-----|
| 8      | 159 | 5      | 1      | 54  | 107 |
| 11     | 160 | 12     | 2      | 55  | 109 |
| 15     | 161 | 14     | 3      | 56  | 110 |
| 16     | 162 | 20     | 4      | 57  | 111 |
| 17     | 163 | 21     | 6      | 58  | 112 |
| 18     | 164 | 22     | 7      | 59  | 113 |
| 24     | 165 | 25     | 9      | 60  | 114 |
| 26     | 166 | 37     | 10     | 61  | 115 |
| 32     | 167 | 39     | 13     | 62  | 116 |
| 42     | 168 | 43     | 19     | 63  | 117 |
| 75     | 169 | 50     | 23     | 66  | 118 |
| 76     | 170 | 67     | 27     | 68  | 119 |
| 80     | 171 | 73     | 28     | 69  | 120 |
| 82     |     | 79     | 29     | 70  | 121 |
| 91     |     | 81     | 30     | 71  | 123 |
| 94     |     | 83     | 31     | 72  | 124 |
| 101    |     | 84     | 33     | 74  | 125 |
| 108    |     | 88     | 34     | 78  | 126 |
| 130    |     | 92     | 35     | 85  | 128 |
| 133    |     | 100    | 36     | 86  | 129 |
| 136    |     | 103    | 38     | 87  | 131 |
| 138    |     | 104    | 40     | 89  | 132 |
| 139    |     | 122    | 41     | 90  | 134 |
| 140    |     | 127    | 44     | 93  | 143 |
| 142    |     | 137    | 45     | 95  | 154 |
| 144    |     | 141    | 46     | 96  | 156 |
| 146    |     | 145    | 47     | 97  |     |
| 147    |     | 148    | 48     | 98  |     |
| 149    |     | 150    | 49     | 99  |     |
| 157    |     | 151    | 51     | 102 |     |
| 158    |     | 152    | 52     | 105 |     |
|        |     | 153    | 53     | 106 |     |
|        |     | 155    |        |     |     |

**Table S4. VIC mAbs in the sNeut, pNeut, or nNeut categories, related to Figure 4.**

The VIC mAbs that were classified into the sNeut, pNeut, or nNeut categories according to the parameters defined by Table S3 and graphed in Figure 4A.

|                                     | All mAbs | Neut. only | Neut. and<br>function | sNeut | pNeut | nNeut | IFN $\gamma$ | mADCP |
|-------------------------------------|----------|------------|-----------------------|-------|-------|-------|--------------|-------|
| <b>Figure</b>                       | 3        | S4A        | S4B                   | 5A    | 5B    | 5C    | 6E           | 6F    |
| <b># of features</b>                | 10       | 4          | 5                     | 5     | 3     | 6     | 8            | 7     |
| <b>Calibration RMSE</b>             | 0.537    | 0.618      | 0.576                 | 0.508 | 0.602 | 0.866 | 0.85         | 0.754 |
| <b>Calibration R<sup>2</sup></b>    | 0.71     | 0.615      | 0.667                 | 0.735 | 0.627 | 0.241 | 0.274        | 0.428 |
| <b>Leave-1-Out CV RMSE</b>          | 0.565    | 0.642      | 0.604                 | 0.617 | 0.648 | 0.925 | 0.881        | 0.788 |
| <b>Leave-1-Out CV R<sup>2</sup></b> | 0.679    | 0.585      | 0.633                 | 0.618 | 0.567 | 0.143 | 0.221        | 0.377 |

**Table S5. Cross-validation statistics for PLSR models related to Figures 3, 5, and 6, and Supplemental Figure S4.**
